# Supplementary material for: Changes in Respiratory Muscle Strength Following Cardiac Rehabilitation for Prognosis in Patients with Heart Failure
Source: PubMed Central journal article supplement (PMC7230659; doi:10.3390/jcm9040952), 2020-03-30

# Changes in respiratory muscle strength following cardiac rehabilitation predict clinical events

## Setting

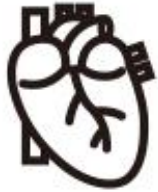

Heart failure  
456 patients

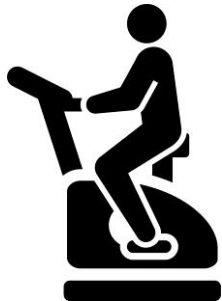

5-month  
Cardiac rehabilitation

## Findings

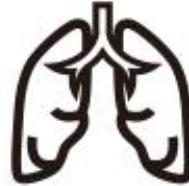

- Maximal inspiratory pressure ( $PI_{max}$ )

**8.1** cmH<sub>2</sub>O (median) ↑

- Positive changes in  $PI_{max}$  per **10** cmH<sub>2</sub>O

All-cause clinical events: **23%** ↓\*

Cardiovascular events: **28%** ↓\*

\*Adjusted for clinical confounders

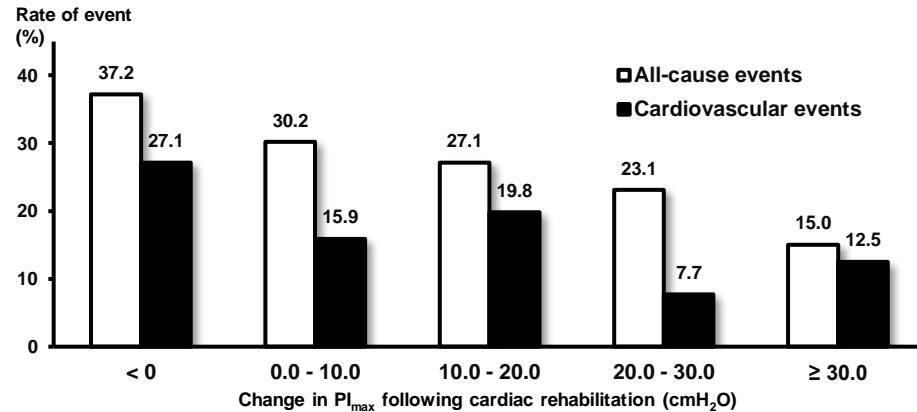

Supplement: jcm-09-00952-s001.pdf [file jcm-09-00952-s001.pdf]
